# Supplementary material
Source: Research Square preprint supplement (doi:10.21203/rs.3.rs-9486208/v1)
Supplement: Supplementary file 1 [file a580ddab3555189a5c3c9c32.docx]

**Appendix 1**:

**RAMESES reporting standards for realist synthesis**

| Item to be included | Page number |
| --- | --- |
| TITLE   1. In the title, identify the document as a realist synthesis or review. | 2 |
| SUMMARY OR ABSTRACT   1. While acknowledging publication requirements and house style, abstracts should ideally contain brief details of: the study’s background, review question or objectives; search strategy; methods of selection, appraisal, analysis and synthesis of sources; main results; and implications for practice . | 3 |
| INTRODUCTION   1. Explain why the review is needed and what it is likely to contribute to existing understanding of the topic area 2. State the objective(s) of the review and/or the review question(s). Define and provide a rationale for the focus of the review | 5-6  6 |
| METHODS   1. Any changes made to the review process that was initially planned should be briefly described and justified. 2. Explain why realist synthesis was considered the most appropriate method to use 3. Describe and justify the initial process of exploratory scoping of the literature 4. While considering specific requirements of the journal or other publication outlet, state and provide a rationale for how the iterative searching was done. Provide details on all the sources accessed for information in the review. Where searching in electronic databases has taken place, the details should include, for example, name of database, search terms, dates of coverage and date last searched. If individuals familiar with the relevant literature and/or topic area were contacted, indicate how they were identified and selected. 5. Explain how judgements were made about including and excluding data from documents, and justify these. 6. Describe and explain which data or information were extracted from the included documents and justify this selection. 7. Describe the analysis and synthesis processes in detail. This section should include information on the constructs analysed and describe the analytic process. | 8  5,6,8  8  8,9  11 Table 2  11  11,12 |
| RESULTS   1. Provide details on the number of documents assessed for eligibility and included in the review with reasons for exclusion at each stage as well as an indication of their source of origin (for example, from searching databases, reference lists and so on). You may consider using the example templates (which are likely to need modification to suit the data) that are provided. 2. Provide information on the characteristics of the documents included in the review. 3. Present the key findings with a specific focus on theory building and testing. | 13,14 Figure 1  15-29 Table 3  30-37, Table 4,  Figure 2 |
| DISCUSSION   1. Summarize the main findings, taking into account the review’s objective(s), research question(s), focus and intended audience(s) 2. Discuss both the strengths of the review and its limitations. These should include (but need not be restricted to) (a) consideration of all the steps in the review process and (b) comment on the overall strength of evidence supporting the explanatory insights which emerged. The limitations identified may point to areas where further work is needed. 3. Where applicable, compare and contrast the review’s findings with the existing literature (for example, other reviews) on the same topic. 4. List the main implications of the findings and place these in the context of other relevant literature. If appropriate, offer recommendations for policy and practice. 5. Provide details of funding source (if any) for the review, the role played by the funder (if any) and any conflicts of interests of the reviewers. | 38  38  39  39  40 |

**Appendix 2: Initial theories from pilot exercise**

Websites of National Sporting Body websites for OECD countries were searched for guidance related to menstruation. Four New Zealand documents were identified for initial theory development as a pilot exercise.

1. Sport NZ IHI Aotearoa [Period products in community sports clubs. Evaluation of a Nationwide research project](https://sportnz.org.nz/media/2xed0uuy/period-products-in-community-clubs-report.pdf) 2024
2. Sport NZ IHI Aotearoa [Balanced female health: a resource for adults supporting young people in community sport](https://sportnz.org.nz/media/vuojkuq2/balanced-female-health-handbook.pdf) 2023
3. Honoco [Hine O Te Kura Youth Symposium: Qualitative Insights](https://sportnz.org.nz/media/i2wpku4l/part-2-qualitative-insights-hine-o-te-kura-youth-symposium.pdf) 2023
4. Education Outdoors New Zealand Going with the Flow: menstruation and rainbow inclusive practices in the outdoors 2022

**The following initial theories were developed** (Key: Context (C), Mechanism (M), Outcome (O))

***Free and accessible period products***

In community sports clubs (C) if period products that are provided are easily available and privately accessible (Resource) then players can use them if they get their period unexpectedly or have financial barriers (M) to increase attendance in training and matches (O)

In community sports clubs (C) that provide free period products (Resource) this may encourage open discussions about periods (M) to reduce period stigma (O)

***Education***

In community sports clubs (C) if coaches, instructors and parents are educated about what is a normal menstrual cycle (Resource) and encourage young people to track their menstrual cycles (Resource) then they are more confident (M) to have open conversations to inform preparation and performance in chosen activities (O)

In community sports clubs (C) if education was aimed at males and females with consideration for cultural customs (Resource) this would encourage communication about menstrual health (O) and reduce stigma (O)

***Facilities and additional menstrual needs***

In outdoor physical activity clubs (C) if education on how to manage period symptoms in this setting is delivered to everyone (Resource) then those who may not identify as women/girls will be included (M) , participation in activities will increase (O) and stigma will reduce (O)

**Appendix 3**: **Medline search strategy adapted for other databases**

| **#** | **Query** |
| --- | --- |
| 1 | exp Menstruation Disturbances/ |
| 2 | exp Menstrual cycle/ |
| 3 | (menstrua* or menses or dysmenorrhea or menorrhagia or period pain* or heavy period* or menarche or eumenorrh*).tw. |
| 4 | (premenstrual adj2 (syndrome* or tension*)).tw. |
| 5 | 1 or 2 or 3 or 4 |
| 6 | exp Exercise/ |
| 7 | exp Sports/ |
| 8 | exp "Physical Education and Training"/ |
| 9 | (exercise* or sport*).tw. |
| 10 | (physical* adj2 (activ* or inactiv* or train* or education)).tw. |
| 11 | 6 or 7 or 8 or 9 or 10 |
| 12 | (participat* or engag* or uptake* or attend* or promot*or perform*).tw. |
| 13 | (involv* or encourag* or increas* or adher* or maintain* or sustain*).ti. |
| 14 | (treat* or manag* or medic* or pharmaceut* or drug*).ti. |
| 15 | 12 or 13 or 14 |
| 16 | 5 and 11 and 15 |
| 17 | limit 15 to (English language and yr="2000 -Current") |

**Appendix 3: Grey literature searches**

| Website or organisation | Searched yes and date |
| --- | --- |
| School education curriculum/policies  [Curriculum for Wales - Hwb](https://hwb.gov.wales/curriculum-for-wales)  [National curriculum in England: physical education programmes of study - GOV.UK](https://www.gov.uk/government/publications/national-curriculum-in-england-physical-education-programmes-of-study/national-curriculum-in-england-physical-education-programmes-of-study)  [A Period Positive National Curriculum for England – Period Positive](https://periodpositive.com/period-positive-menstruation-education-programme-of-study/) | 3/10/25 |
| Google Advanced Search  <https://www.google.co.uk/advanced_search> | 15/9/25 |
| NHS England  <https://www.england.nhs.uk/> | 15/9/25 |
| NHS Wales  <https://www.wales.nhs.uk/> | 15/9/25 |
| NHS Scotland  <https://www.careers.nhs.scot/careers/find-your-career/returning-to-practice/> | 15/9/25 |
| Health and Social Care Northern Ireland  <https://www.hscni.net/> | 15/9/25 |
| Welsh Government  <https://gov.wales/> | 15/9/25 |
| UK Government  <https://www.gov.uk/> | 15/9/25 |
| Scottish Government  <https://www.gov.scot/> | 15/9/25 |
| Northern Ireland Executive  <https://www.northernireland.gov.uk/> | 15/9/25 |
| World Health Organization  [www.who.int](http://www.who.int) | 15/9/25 |
| World Health Organisation Institutional Repository for Information Sharing (IRIS)  <https://iris.who.int/> | 15/9/25 |
| Centers for Disease Control and Prevention  <https://www.cdc.gov/> | 15/9/25 |
| National Institute for Health and Care Excellence  <https://www.nice.org.uk/> | 15/9/25 |
| Public Health Wales  <https://phw.nhs.wales/> | 15/9/25 |
| UK Health Security Agency  <https://researchportal.ukhsa.gov.uk/> | 15/9/25 |
| Office for Health Improvement & Disparities  <https://www.gov.uk/government/organisations/office-for-health-improvement-and-disparities> | 15/9/25 |
| Public Health Scotland  <https://publichealthscotland.scot/> | 15/9/25 |
| Public Health Northern Ireland  <https://www.publichealth.hscni.net/> | 15/9/25 |
| Women in Sport  <https://womeninsport.org/> | 15/9/25 |
| Youth Sport Trust  <https://www.youthsporttrust.org/> | 15/9/25 |
| Period Education UK  <https://www.periodeducation.org/> | 15/9/25 |
| Optimal Period  <https://optimalperiod.com/> | 15/9/25 |
| Bloody Brilliant  <https://bloodybrilliant.wales/> | 15/9/25 |
| Bloody Good Period  <https://www.bloodygoodperiod.com/> | 15/9/25 |
| Menstruation Research Network  <https://menstruationresearchnetwork.org.uk/> | No – unable to access |
| Fair Treatment for the Women of Wales  <https://www.ftww.org.uk/> | 15/9/25 |
| Plan International UK  https://plan-uk.org/our-work/health-and-rights/periods | 15/9/25 |
| Women Connect First  <https://womenconnectfirst.org.uk/> | 15/9/25 |
| Womankind Worldwide  <https://www.womankind.org.uk/> | 15/9/25 |
| UN Women  <https://www.unwomen.org/en> | 15/9/25 |
| Global Fund for Women  <https://www.globalfundforwomen.org/what-we-do/> | 15/9/25 |
| The National Alliance of Women’s Organisations (NAWO)  <https://nawo.org.uk/> | 15/9/25 |
| Women for Women International (Resources Library)  <https://www.womenforwomen.org/monitoring-evaluation-research-and-learning-resource-library?_gl=1*8bly34*_ga*MTQxNjkwNzE5OS4xNzEyMTUxNjM1*_ga_V8MFX11JQX*MTcxMjE1MTYzNS4xLjEuMTcxMjE1MTk5NC40Mi4wLjA> | 15/9/25 |
| International Alliance of Women  <https://womenalliance.org/> | 15/9/25 |
| National Sporting body websites of 41 Organisation for Economic Cooperation (OECD) Countries  New Zealand Sportnz.org.nz  Australia https://www.ausport.gov.au  United Kingdom https://www.uksport.gov.uk  England https://www.sportengland.org/  Scotland https://sportscotland.org.uk/  Wales https://www.sport.wales/  Northern Ireland https://www.sportni.net/  Ireland https://www.sportireland.ie/  United States https://www.usopc.org/  Canada https://www.canada.ca/en/canadian-heritage/services/sport-organizations/national.html,  https://olympic.ca/  Chile https://coch.cl/  Mexico https://www.gob.mx/conade/en  Colombia https://olimpicocol.co/web/  Japan https://www.mext.go.jp/sports/en/  Korea (South Korea)https://www.sports.or.kr/sports/main/main.do  Denmark https://www.dif.dk/  Iceland https://www.isi.is/  Lithuania https://www.ltok.lt/en  Portugal Portuguese Institute for Sport and Youth (IDPJ)  Austria https://www.sportaustria.at/de/start  Estonia https://www.eok.ee/  Luxembourg https://sports.public.lu/fr.html  Slovak Republic https://www.olympic.sk/  Belgium https://www.sport.vlaanderen/  https://www.sport-adeps.be/  Finland https://suek.fi/en/fincis/  Israel https://www.olympicsil.co.il/  Slovenia https://www.sportna-unija.si/  France https://www.sports.gouv.fr/  Italy https://www.coni.it/en/  Netherlands https://nocnsf.nl/en  Spain https://www.csd.gob.es/en  Germany https://www.dosb.de/  Sweden https://www.rf.se/  Czech Republic https://nsa.gov.cz/  Greece https://www.hoc.gr/  Norway https://www.idrettsforbundet.no/  Switzerland https://www.baspo.admin.ch/de  Hungary https://olimpia.hu/  Latvia https://lsfp.lv/  Poland https://olimpijski.pl/en/  Turkey https://www.gsb.gov.tr/tr | 15/4/25 - 13/5/25 |

**Appendix 4: Example of CMO development from explanatory ‘if then because’ statements**

| **Data extract** | **If then because statement** | **CMO** |
| --- | --- | --- |
| “More education for both athletes and coaches would also help open the conversation and destigmatize the topic of menstruation. Lucy explained, “just everyone being more open would make it easier to talk to a coach about it. Cause you never know if people are gonna go like ‘ew’ when you bring up the subject” (Keil et al., 2024) | If athletes and coaches are educated then conversations will be easier because the topic has been normalised | When there is a lack of knowledge about the menstrual cycle (C) educating athletes and coaches (Resource) will improve understanding and normalisation of the topic (M) which could improve communication about menstrual health and support with physical activity (O)  (Keil et al., 2024) (Goorevich & Zipp, 2024 (Brown & Knight, 2022)) (Carmichael et al., 2024) |
| “Teaching younger athletes was identified as important. The athletes argued that if young athletes learnt about the menstrual cycle “younger, it wouldn’t be as big a shock” and it would become more “normalized.” (Goorevich & Zipp, 2024) | If education is aimed at younger athletes then the subject becomes more normalised |
| “Education is required to enhance coaches and practitioner’s  knowledge and understanding to create a more open and  understanding environment in sport, addressing their own  discomfort regarding the menstrual cycle.” (Brown & Knight, 2022) | If menstrual health education is provided to coaches then this will improve support for athletes because they have greater understanding and will feel less uncomfortable discussing the subject |
| “Education targeting these (menstrual) knowledge gaps may facilitate early intervention by enabling athletes to recognise and disclose signs of menstrual dysfunction, improve the interpretation of the collected data (e.g., distinguish withdrawal from menstrual bleeding), and contribute to a more impactful menstrual cycle tracking programme. Education should encourage athletes, coaches, and other support staff to discuss the menstrual cycle openly and accurately with each other. (Carmichael et al., 2024) | If education about the menstrual cycle is provided along with menstrual cycle tracking then this may improve communication and interpretation because there is increased knowledge and understanding |

Key: Context (C), Mechanism (M), Outcome (O), CMO (Context-Mechanism-Outcome Configuration)
